# Supplementary material for: Enhanced thermoelectric performance of CNT/P3HT composites with low CNT content
Source: Royal Society of Chemistry journal article supplement (doi:10.1039/c8ra07297c), 2018-01-01
Supplement: c8ra07297c1.pdf [file c8ra07297c1.pdf]

## Enhanced thermoelectric performance of CNT/P3HT composites with low CNT content

Sanyin Qu<sup>a,\*</sup>, Mengdi Wang<sup>a,b</sup>, Yanling Chen<sup>a,b</sup>, Qin Yao<sup>a,\*</sup>, Lidong Chen<sup>a,c</sup>

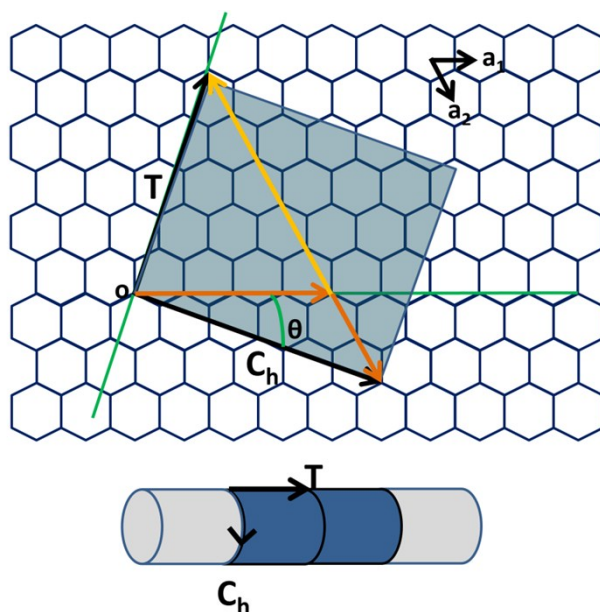

**Figure S1.** CNTs are made by rolling a graphene sheet into a cylinder.

<sup>a</sup> State Key Laboratory of High Performance Ceramics and Superfine Microstructure and CAS Key Laboratory of Materials for Energy Conversion, Shanghai Institute of Ceramics, Chinese Academy of Sciences, Shanghai 200050, China; Email: [qusanyin@mail.sic.ac.cn](mailto:qusanyin@mail.sic.ac.cn), [yaoqin@mail.sic.ac.cn](mailto:yaoqin@mail.sic.ac.cn)

<sup>b</sup> University of Chinese Academy of Sciences, Beijing 100049, China;

<sup>c</sup> Shanghai Institute of Materials Genome, Shanghai 200050, China.
